# Supplementary material
Source: PubMed Central journal article supplement (PMC3511772)

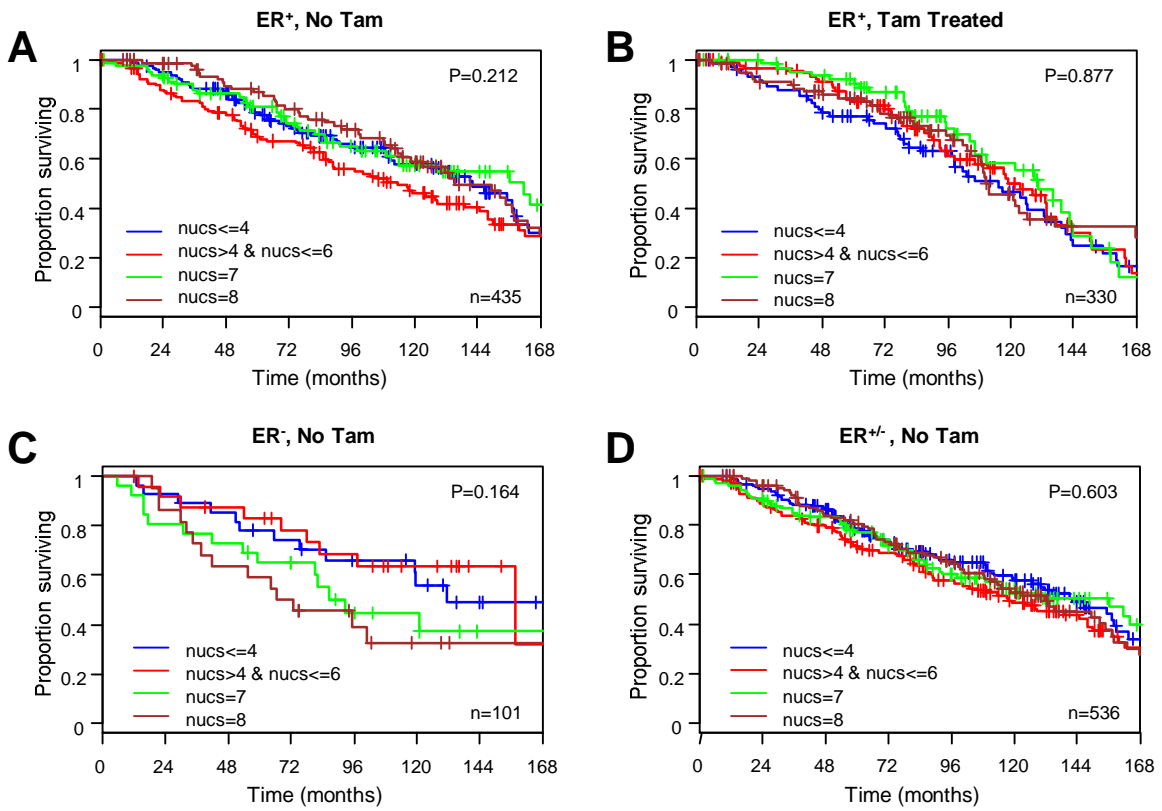

Supplemental Figure 2

Supplement: NIHMS410726-supplement-10549_2012_2262_MOESM3_ESM.pdf [file NIHMS410726-supplement-10549_2012_2262_MOESM3_ESM.pdf]
